# Supplementary material for: Parkinson’s Disease Causative Mutation in Vps35 Disturbs Tetherin Trafficking to Cell Surfaces and Facilitates Virus Spread
Source: MDPI journal article supplement (doi:10.3390/cells10040746), 2021-03-28
Supplement: s1 [file s1]

Article

# Parkinson's Disease Causative Mutation in Vps35 Disturbs Tetherin Trafficking to Cell Surfaces and Facilitates Virus Spread

Yingzhuo Ding <sup>1,†</sup>, Yan Li <sup>1,†</sup>, Gaurav Chhetri <sup>1</sup>, Xiaoxin Peng <sup>1</sup>, Jing Wu <sup>1</sup>, Zejian Wang <sup>1</sup>, Bo Zhao <sup>1</sup>, Wenjuan Zhao <sup>1</sup> and Xueyi Li <sup>1,2,\*</sup>

<sup>1</sup> School of Pharmacy, Shanghai Jiao Tong University, Shanghai 200240, China; yingzhuoD@sjtu.edu.cn (Y.D.); 018170210001@sjtu.edu.cn (Y.L.); gvchhetri@sjtu.edu.cn (G.C.); xypeng@sjtu.edu.cn (X.P.); wjszmwzswy@sjtu.edu.cn (J.W.); wangzejian@sjtu.edu.cn (Z.W.); bozhao@sjtu.edu.cn (B.Z.); zhaowj@sjtu.edu.cn (W.Z.)

<sup>2</sup> Department of Neurology, Massachusetts General Hospital and Harvard Medical School, Charlestown, MA 02129, USA

\* Correspondence: Xueyili@sjtu.edu.cn or Xueyi.Li@mgh.harvard.edu

† These authors contributed equally.

**Citation:** Ding, Y.; Li, Y.; Chhetri, G.; Peng, X.; Wu, J.; Wang, Z.; Zhao, B.; Zhao, W.; Li, X. Parkinson's Disease Causative Mutation in Vps35 Disturbs Tetherin Trafficking to Cell Surfaces and Facilitates Virus Spread. *Cells* **2021**, *10*, x. <https://doi.org/10.3390/xxxxx>

Academic Editor: Wolfgang Jost, Alexander E. Kalyuzhny  
Received: 28 January 2021  
Accepted: 25 March 2021  
Published: date

**Publisher's Note:** MDPI stays neutral with regard to jurisdictional claims in published maps and institutional affiliations.

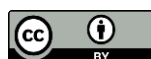

**Copyright:** © 2021 by the authors. Submitted for possible open access publication under the terms and conditions of the Creative Commons Attribution (CC BY) license (<http://creativecommons.org/licenses/by/4.0/>).

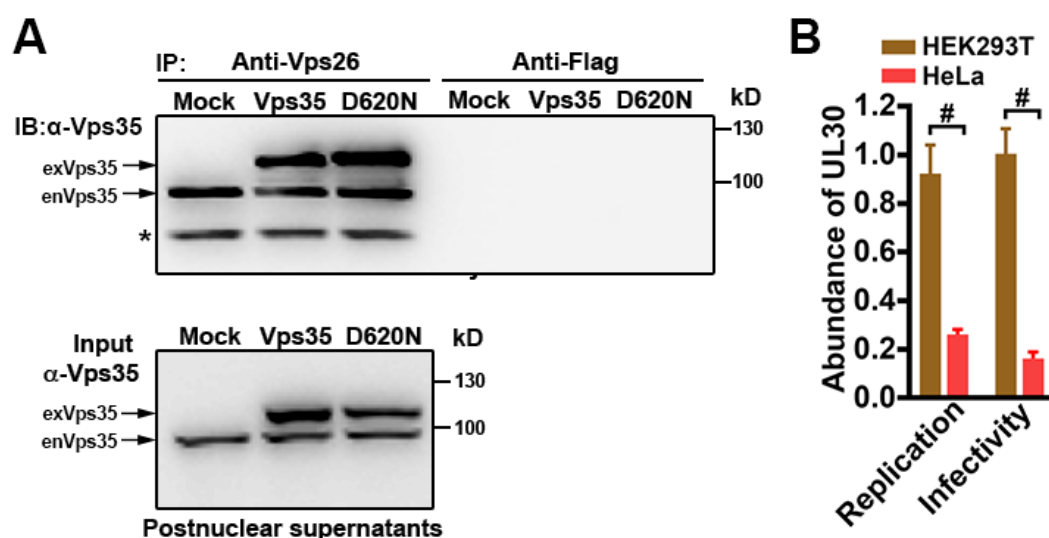

**Figure S1.** (A) Co-precipitation of ectopically expressed vacuolar protein sorting 35 ortholog (Vps35) with endogenous Vps26. Post-nuclear supernatants of HeLa cells transfected with plasmids expressing dsRed-Vps35 or dsRed-Vps35D620N were incubated with protein-A resins pre-coupled with antibodies for Vps26 or for FLAG. Protein complexes bound on resins were washed four times in lysis buffer, each for 15 minutes, and eluted into SDS-PAGE sample buffers for Western blot analysis with antibodies for Vps35. (B) HeLa cells contained and released significantly more copies of HSV-1 virions than HEK293T cells. Titers of herpes simplex virus (HSV)-1 virions were determined by relative abundance of UL30 inside initial infected cells (replication) and cells exposed to respective conditioned media for 2 hours (infectivity).

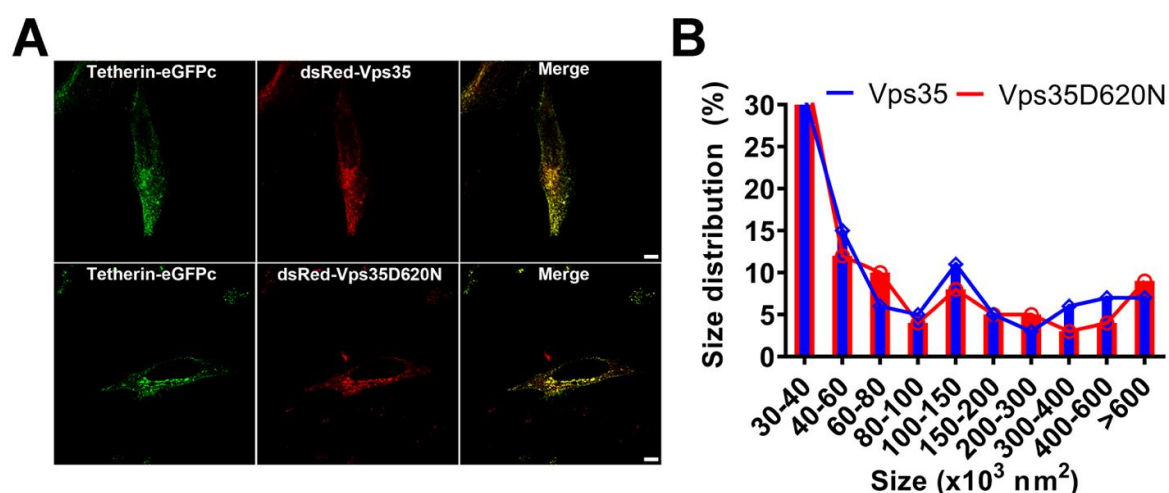

**Figure S2.** Comparison of co-localization of Tetherin-eGFPc between Vps35 wildtype and D620N mutant in fixed cells. HeLa cells on glass coverslips were transfected with plasmids expressing Tetherin-eGFPc along with plasmids expressing dsRed-Vps35 or with plasmids expressing dsRed-Vps35D620N and processed exactly the same as in Figure 6. (A) Confocal images. Scale bars: 10µm. (B) Plots show size distribution of structures co-labeled with Tetherin-GFPc and dsRed-Vps35 or with Tetherin-eGFPc and dsRed-Vps35.

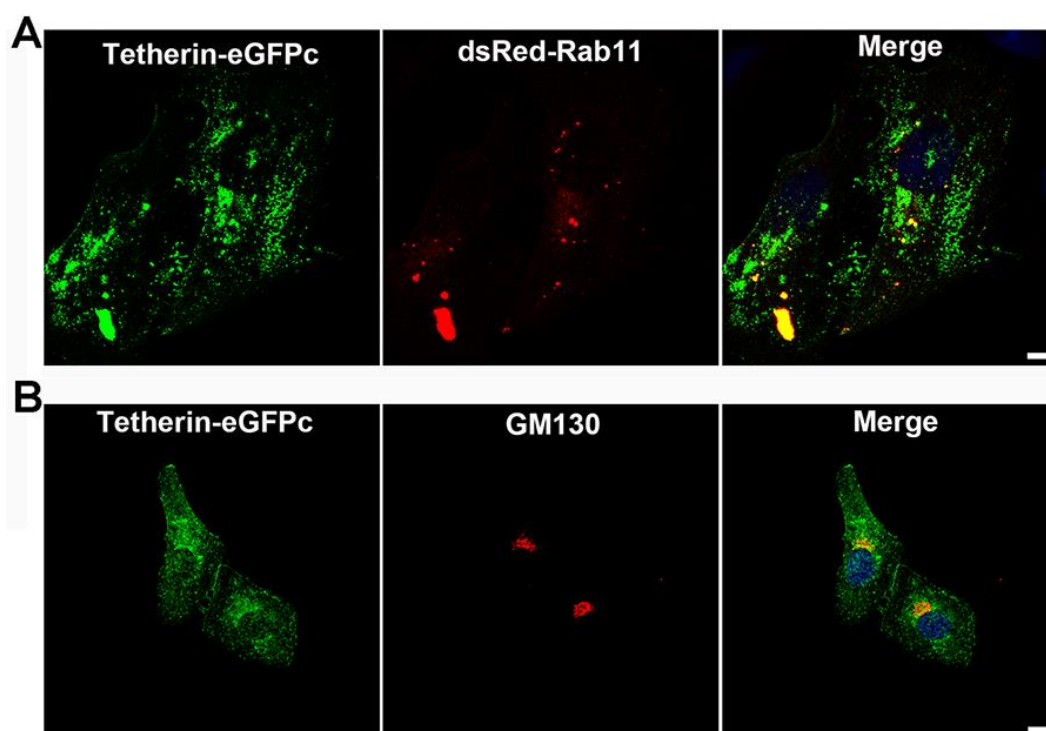

**Figure S3.** Co-localization of Tetherin-eGFPc with dsRed-Rab11 (A) or with GM130 (B). HeLa cells on glass coverslips were transfected with plasmids expressing Tetherin-eGFPc alone or together with plasmids expressing dsRed-Rab11. After being treated with cycloheximide, cells were fixed and processed for fluorescence microscopy. Cells transfected with Tetherin-eGFPc expressing plasmids alone were incubated with antibodies against GM130 followed by Cy3-conjugated secondary antibodies. Shown are confocal images. Scale bars: 10µm.

**Video S1.** Tetherin-GFPc traffics together with dsRed-Vps35

**Video S2.** Tetherin-GFPc traffics together with dsRed-Vps35D620N
